# Supplementary material for: Genetic Polymorphisms in VEGFR Coding Genes (FLT1/KDR) on Ranibizumab Response in High Myopia and Choroidal Neovascularization Patients
Source: MDPI journal article supplement (doi:10.3390/pharmaceutics14081555), 2022-07-26
Supplement: s1 [file s1]

# Supplementary Materials: Genetic Polymorphisms in VEGFR Coding Genes (*FLT1/KDR*) on Ranibizumab Response in High Myopia and Choroidal Neovascularization Patients

David Blázquez-Martínez, Xando Díaz-Villamarín, Sonia García-Rodríguez, Alba Antúnez-Rodríguez, Ana Pozo-Agundo, Luis Javier Martínez-González, José Ignacio Muñoz-Ávila and Cristina Lucía Dávila -Fajardo

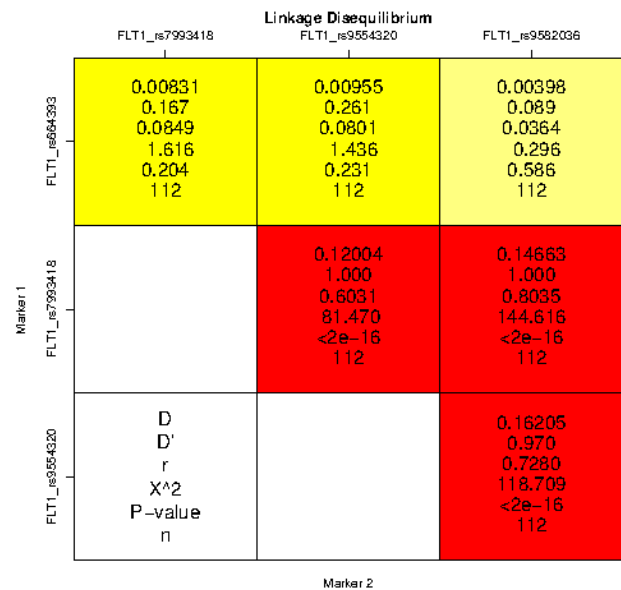

Figure S1. Linkage disequilibrium (LD) analysis of FLT1 genetic variants.

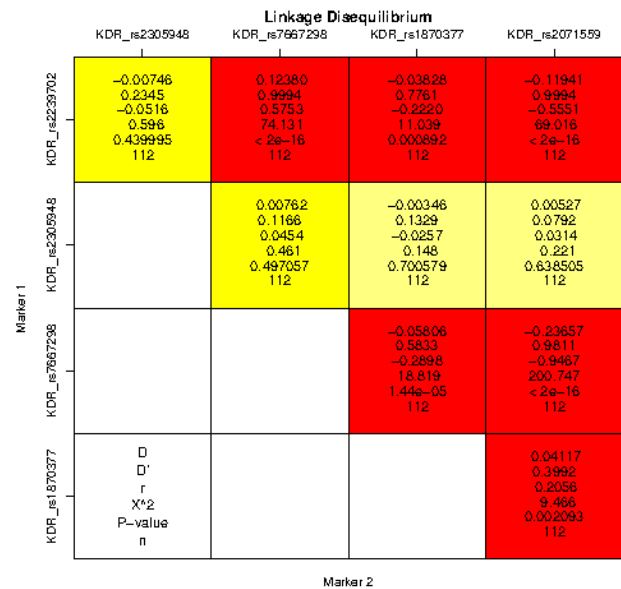

Figure S2. Linkage disequilibrium (LD) analysis of KDR genetic variants.

**Table S1.** Haplotypes frequencies of FLT1 variants and association with response.

| * Id | rs664393 | rs7993418 | rs9554320 | rs9582036 | Total | BCVA Improvement |       | OR (95% CI)        | p-value |
|------|----------|-----------|-----------|-----------|-------|------------------|-------|--------------------|---------|
|      |          |           |           |           |       | YES              | NO    |                    |         |
| 1    | C        | A         | C         | A         | 0.555 | 0.575            | 0.486 | reference          | -       |
| 2    | C        | G         | A         | C         | 0.182 | 0.172            | 0.226 | 1.65 (0.72 – 3.80) | 0.24    |
| 3    | C        | A         | A         | A         | 0.121 | 0.127            | 0.111 | 0.85 (0.32 – 2.24) | 0.75    |
| 4    | C        | A         | A         | C         | 0.076 | 0.057            | 0.113 | 3.05 (0.95 – 9.78) | 0.064   |
| * Id | rs664393 | rs7993418 | rs9554320 | rs9582036 | Total | BCVA Worsening   |       | OR (95% CI)        | p-value |
|      |          |           |           |           |       | YES              | NO    |                    |         |
| 1    | C        | A         | C         | A         | 0.555 | 0.667            | 0.550 | reference          | -       |
| 2    | C        | G         | A         | C         | 0.182 | NA               | 0.193 | NA                 |         |
| 3    | C        | A         | A         | A         | 0.121 | 0.083            | 0.121 | NA                 |         |
| 4    | C        | A         | A         | C         | 0.076 | 0.167            | 0.070 | NA                 |         |

\* Only shows haplotypes with frequency higher than 0.1 in at least one group; rs: Reference single nucleotide polymorphism (SNP); BCVA: Best-corrected visual acuity; OR: Odds ratio.

**Table S2.** Haplotypes frequencies of KDR variants and association with response.

| Id   | rs2239702 | rs2305948 | rs7667298 | rs1870377 | rs2071559 | Total | BCVA Improvement |       | OR (95% CI)        | p-value |
|------|-----------|-----------|-----------|-----------|-----------|-------|------------------|-------|--------------------|---------|
|      |           |           |           |           |           |       | YES              | NO    |                    |         |
| 1    | G         | C         | C         | T         | T         | 0.295 | 0.293            | 0.323 | reference          | -       |
| 2    | A         | C         | T         | T         | C         | 0.219 | 0.215            | 0.226 | 0.86 (0.35 – 2.08) | 0.730   |
| 3    | G         | C         | T         | T         | C         | 0.173 | 0.134            | 0.258 | 2.15 (0.90 – 5.15) | 0.089   |
| 4    | G         | C         | C         | A         | T         | 0.119 | 0.133            | 0.097 | 0.68 (0.21 – 2.20) | 0.520   |
| * Id | rs2239702 | rs2305948 | rs7667298 | rs1870377 | rs2071559 | Total | BCVA Worsening   |       | OR (95% CI)        | p-value |
|      |           |           |           |           |           |       | YES              | NO    |                    |         |
| 1    | G         | C         | C         | T         | T         | 0.295 | 0.083            | 0.305 | reference          | -       |
| 2    | A         | C         | T         | T         | C         | 0.219 | 0.500            | 0.205 | 0.09 (0.01 – 0.86) | 0.039   |
| 3    | G         | C         | T         | T         | C         | 0.173 | 0.167            | 0.174 | 0.41 (0.04 – 4.39) | 0.46    |
| 4    | G         | C         | C         | A         | T         | 0.119 | 0.167            | 0.117 | 0.17 (0.01 – 2.13) | 0.17    |

\* Only shows haplotypes with frequency higher than 0.1 in at least one group; rs: Reference single nucleotide polymorphism (SNP); BCVA: Best-corrected visual acuity; OR: Odds ratio.
